# Supplementary material for: Information and Communication Systems to Tackle Barriers to Breastfeeding: Systematic Search and Review
Source: PubMed Central journal article supplement (PMC6818436; doi:10.2196/13947), 2019-09-27
Supplement: jmir_v21i8e13947_app1.pdf [file jmir_v21i8e13947_app1.pdf]

Table A1. Summary of the effectiveness of the breastfeeding educational interventions for mothers and training tools for health care professionals that were validated clinically.

| Reference                         | Breast feeding knowledge | Intention to breastfeed       | Self-efficacy  | Breast feeding rate | Breast feeding attitude | Skills to support breast feeding |
|-----------------------------------|--------------------------|-------------------------------|----------------|---------------------|-------------------------|----------------------------------|
| Edwards et al, 2013 [36]          | —                        | ↑ <sup>a</sup> n <sup>b</sup> | ↑ <sup>n</sup> | —                   | 0 <sup>c</sup>          | —                                |
| Grassley et al, 2017 [37]         | —                        | 0                             | 0              | —                   | —                       | —                                |
| Huang et al, 2007 [38]            | ↑                        | —                             | —              | ↑                   | ↑                       | —                                |
| Joshi et al, 2016 [39]            | ↑                        | ↑                             | ↑              | —                   | —                       | —                                |
| Labarere et al, 2011 [40]         | 0                        | —                             | —              | 0                   | —                       | —                                |
| Cianelli et al, 2015 [23]         | ↑                        | —                             | —              | —                   | —                       | —                                |
| Colaceci et al, 2017 [41]         | —                        | —                             | —              | —                   | ↑                       | ↑                                |
| Deloian et al, 2015 [42]          | ↑                        | —                             | —              | —                   | —                       | —                                |
| Lasarte Velillas et al, 2007 [44] | ↑                        | —                             | —              | —                   | —                       | —                                |
| Lewin and O'Connor, 2012 [45]     | ↑                        | —                             | —              | —                   | —                       | —                                |
| O'Connor et al, 2011 [46]         | ↑                        | —                             | —              | —                   | —                       | —                                |

<sup>a</sup>↑ indicates increase.

<sup>b</sup>n indicates not statistically significant.

<sup>c</sup>0 indicates no effect.

— not applicable

Table A2. Summary of the effectiveness of the breastfeeding promotion/encouragement interventions that were validated clinically.

| Reference                   | Intention to breastfeed | Self-efficacy                 | Breast feeding rate | Breast feeding duration | Breast feeding exclusivity | Confidence in feeding methods | Milk supply perception |
|-----------------------------|-------------------------|-------------------------------|---------------------|-------------------------|----------------------------|-------------------------------|------------------------|
| Gallegos et al, 2014 [48]   | —                       | ↑ <sup>a</sup> n <sup>b</sup> | 0 <sup>c</sup>      | —                       | ↑                          | —                             | —                      |
| Jiang et al, 2014 [49]      | —                       | —                             | —                   | ↑                       | ↑                          | —                             | —                      |
| Litterbach et al, 2017 [50] | 0                       | —                             | —                   | —                       | —                          | ↑                             | ↑                      |
| Maslowsky et al, 2016 [51]  | —                       | —                             | —                   | —                       | ↑                          | —                             | —                      |
| Unger et al, 2018 [53]      | —                       | —                             | —                   | ↑                       | ↑                          | —                             | —                      |

<sup>a</sup>↑ indicates increase.

<sup>b</sup>n indicates not statistically significant.

<sup>c</sup>0 indicates no effect.

— not applicable

Table A3. Summary of the effectiveness of the communication support systems that were validated clinically.

| Reference               | Breast feeding duration | Breast feeding exclusivity | Postpartum depression         |
|-------------------------|-------------------------|----------------------------|-------------------------------|
| Giglia et al, 2015 [59] | ↑ <sup>a</sup>          | —                          | —                             |
| Ahmed et al, 2016 [60]  | ↑                       | ↑                          | ↓ <sup>b</sup> n <sup>c</sup> |

<sup>a</sup>↑ indicates increase.

<sup>b</sup>↓ indicates decrease.

<sup>c</sup>n indicates not statistically significant.

— not applicable
